# Supplementary material for: Chemoradiotherapy enhanced the efficacy of radiotherapy in nasopharyngeal carcinoma patients: a network meta-analysis
Source: PubMed Central journal article supplement (PMC5503653; doi:10.18632/oncotarget.16349), 2017-03-17
Supplement: oncotarget-08-39782-s001.pdf [file oncotarget-08-39782-s001.pdf]

# Chemoradiotherapy enhanced the efficacy of radiotherapy in nasopharyngeal carcinoma patients: a network meta-analysis

## Supplementary Material

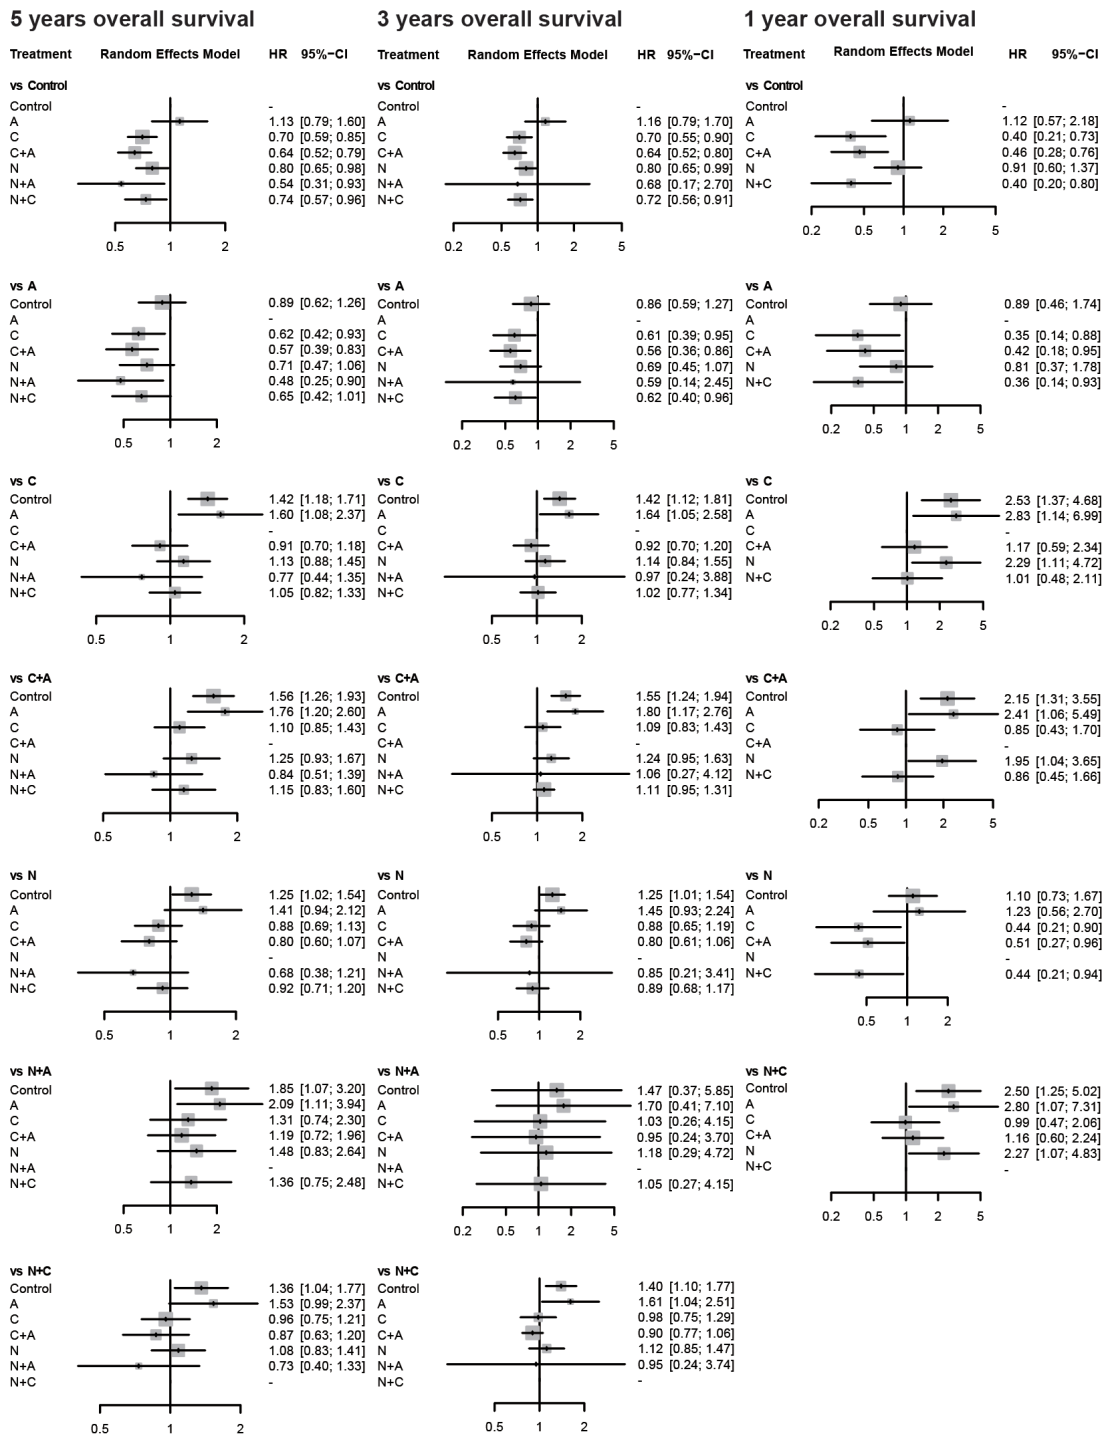

Figure S1: Forest plot for 5-year, 3-year and 1-year overall survival.

### Complete response

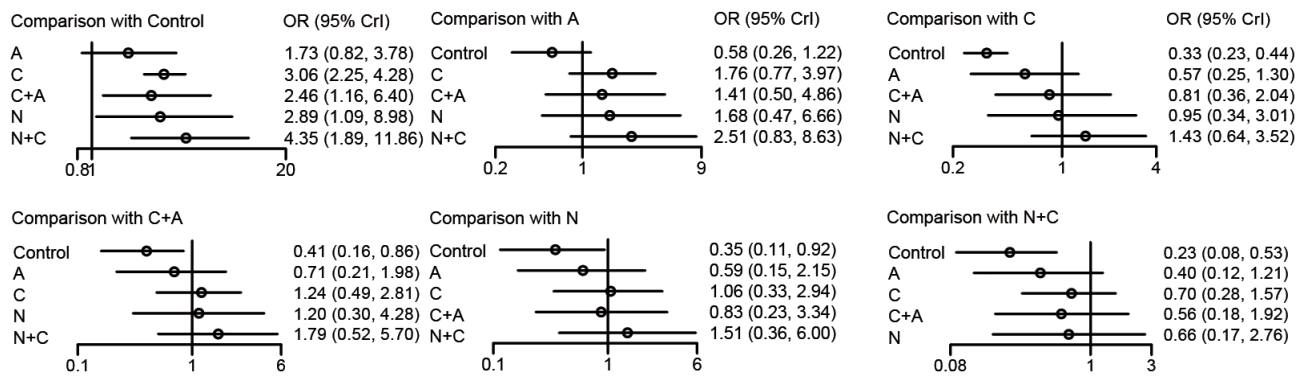

Figure S2: Forest plot for complete response.

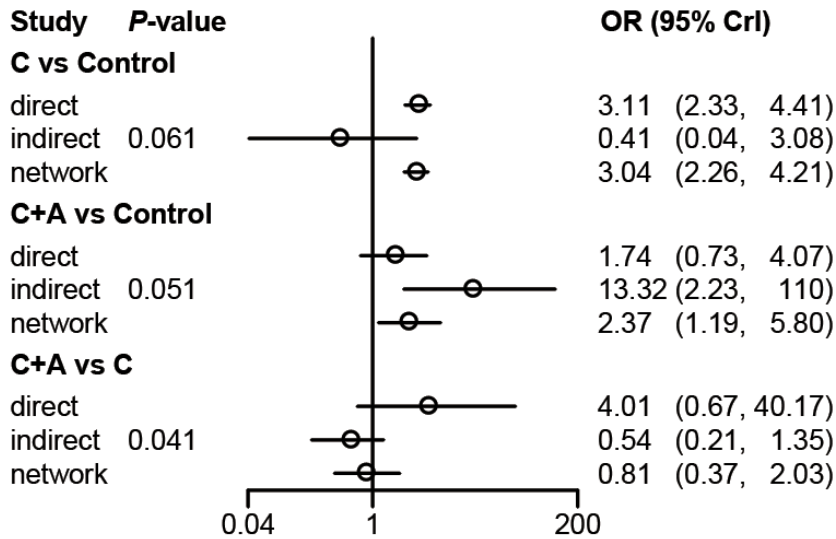

Figure S3: Node splitting results for complete response.
